# Supplementary material
Source: ML conference proceedings conference paper supplement (https://proceedings.mlr.press/v161/hannun21a.html)
Supplement: Supplementary file [file hannun21a-supp.pdf]

# Measuring Data Leakage in Machine-Learning Models with Fisher Information (Supplementary material)

Awni Hannun<sup>1</sup>

Chuan Guo<sup>1</sup>

Laurens van der Maaten<sup>1</sup>

<sup>1</sup> Facebook AI Research

## A FISHER INFORMATION OF THE GAUSSIAN MECHANISM

We provide a simple derivation of the FIM of the Gaussian mechanism applied to the empirical risk minimizer,  $\mathbf{w}^*$ . The conditional probability density of the output perturbed parameters is given by:

$$p(\mathbf{w}' | \mathcal{D}) = \int_{\mathbf{w}^*} p(\mathbf{w}' | \mathbf{w}^*, \mathcal{D}) p(\mathbf{w}^* | \mathcal{D}) d\mathbf{w}^* = p(\mathbf{w}' | \mathbf{w}^*) \quad (1)$$

where in the last step we use the fact that  $\mathbf{w}^*$  is sufficient for  $\mathbf{w}'$ . We also assume  $f(\mathcal{D})$  is deterministic, and hence  $p(\mathbf{w}^* | \mathcal{D})$  is a (shifted) delta function nonzero at the optimal parameters,  $\mathbf{w}^*$ .

Using equation 1, the gradient of  $\log p(\mathbf{w}' | \mathcal{D})$  with respect to  $\mathcal{D}$  is given by:

$$\nabla_{\mathcal{D}} \log p(\mathbf{w}' | \mathcal{D}) = \mathbf{J}_f^\top \nabla_{\mathbf{w}^*} \log p(\mathbf{w}' | \mathbf{w}^*) \quad (2)$$

where  $\mathbf{J}_f$  is the Jacobian of  $f(\mathcal{D})$  with respect to  $\mathcal{D}$ . The Hessian is:

$$\nabla_{\mathcal{D}}^2 \log p(\mathbf{w}' | \mathcal{D}) = \mathbf{J}_f^\top \nabla_{\mathbf{w}^*}^2 \log p(\mathbf{w}' | \mathbf{w}^*) \mathbf{J}_f + \mathbf{H} \nabla_{\mathbf{w}^*} \log p(\mathbf{w}' | \mathbf{w}^*) \quad (3)$$

where  $\mathbf{H}$  is the three-dimensional tensor of second-order derivatives (in a slight abuse of notation  $\mathbf{H}_{ijk} = \frac{\partial^2 f_k}{\partial \mathcal{D}_i \partial \mathcal{D}_j}$ ). Using the second-order expression for the FIM requires evaluating the expectation over  $\mathbf{w}'$  of equation 3.

When using zero-mean isotropic Gaussian noise for the perturbation,  $\mathcal{N}(0, \sigma^2 \mathbf{I})$ , the expectation over  $\mathbf{w}'$  of equation 3 simplifies. The gradient of  $\log p(\mathbf{w}' | \mathbf{w}^*)$  is:

$$\nabla_{\mathbf{w}^*} \log p(\mathbf{w}' | \mathbf{w}^*) = \frac{\mathbf{w}' - \mathbf{w}^*}{\sigma^2}, \quad (4)$$

and hence the Hessian is:

$$\nabla_{\mathbf{w}^*}^2 \log p(\mathbf{w}' | \mathbf{w}^*) = -\frac{1}{\sigma^2} \mathbf{I}. \quad (5)$$

Evaluating the expectation of equation 3 using the above expressions yields:

$$\begin{aligned} \mathbb{E} [\mathbf{J}_f^\top \nabla_{\mathbf{w}^*}^2 \log p(\mathbf{w}' | \mathbf{w}^*) \mathbf{J}_f + \mathbf{H} \nabla_{\mathbf{w}^*} \log p(\mathbf{w}' | \mathbf{w}^*)] &= \\ \mathbf{J}_f^\top \mathbb{E} [\nabla_{\mathbf{w}^*}^2 \log p(\mathbf{w}' | \mathbf{w}^*)] \mathbf{J}_f + \mathbf{H} \mathbb{E} [\nabla_{\mathbf{w}^*} \log p(\mathbf{w}' | \mathbf{w}^*)] &= \\ -\frac{1}{\sigma^2} \mathbf{J}_f^\top \mathbf{J}_f, & \end{aligned}$$

where the second term vanishes since  $\mathbb{E}[\mathbf{w}'] = \mathbf{w}^*$ . Hence the FIM is given by:

$$\mathcal{I}_{\mathbf{w}'}(\mathcal{D}) = -\mathbb{E} [\nabla_{\mathcal{D}}^2 \log p(\mathbf{w}' | \mathcal{D})] = \frac{1}{\sigma^2} \mathbf{J}_f^\top \mathbf{J}_f. \quad (6)$$

## B JACOBIAN OF THE MINIMIZER

Let  $\ell(\mathbf{w}^\top \mathbf{x}, y)$  be a convex, twice-differentiable loss function. Let  $f_i(\mathbf{x}, y)$  denote the minimizer of the regularized empirical risk as a function of  $(\mathbf{x}, y)$  at the  $i$ -th example:

$$f_i(\mathbf{x}, y) = \arg \min_{\mathbf{w}} \sum_{j \neq i} \ell(\mathbf{w}^\top \mathbf{x}_j, y_j) + \ell(\mathbf{w}^\top \mathbf{x}, y) + \frac{n\lambda}{2} \|\mathbf{w}\|_2^2. \quad (7)$$

We aim to derive an expression for  $\mathbf{J}_{f_i} |_{x_i, y_i}$ , the Jacobian of  $f_i(\mathbf{x}, y)$  with respect to  $(\mathbf{x}, y)$  evaluated at  $(x_i, y_i)$ . Taking the gradient of equation 7 with respect to  $\mathbf{w}$  and setting it to 0 gives an implicit function for  $\mathbf{w}^* = f_i(\mathbf{x}, y)$ :

$$0 = \sum_{j \neq i} \nabla_{\mathbf{w}} \ell(\mathbf{w}^{*\top} \mathbf{x}_j, y_j) + \nabla_{\mathbf{w}} \ell(\mathbf{w}^{*\top} \mathbf{x}, y) + n\lambda \mathbf{w}^*. \quad (8)$$

Implicit differentiation of equation 8 with respect to  $(\mathbf{x}, y)$  gives:

$$0 = \sum_{j \neq i} \nabla_{\mathbf{w}}^2 \ell(\mathbf{w}^{*\top} \mathbf{x}_j, y_j) \mathbf{J}_{f_i} + \nabla_{\mathbf{x}, y} \nabla_{\mathbf{w}} \ell(\mathbf{w}^{*\top} \mathbf{x}, y) + n\lambda \mathbf{J}_{f_i}. \quad (9)$$

The second term can be computed using the product rule:

$$\begin{aligned} \nabla_{\mathbf{x}, y} \nabla_{\mathbf{w}} \ell(\mathbf{w}^{*\top} \mathbf{x}, y) &= \\ \nabla_{\mathbf{w}}^2 \ell(\mathbf{w}^{*\top} \mathbf{x}, y) \mathbf{J}_{f_i} + \nabla_{\mathbf{x}, y} \nabla_{\mathbf{w}} \ell(\mathbf{w}^\top \mathbf{x}, y) \Big|_{\mathbf{w}=\mathbf{w}^*}. & \end{aligned} \quad (10)$$

Evaluating equation 10 at  $(\mathbf{x}_i, y_i)$  and substituting into equation 9 yields:

$$\begin{aligned}
0 &= \\
&\left[ \sum_{j=1}^n \nabla_{\mathbf{w}}^2 \ell(\mathbf{w}^{*\top} \mathbf{x}_j, y_j) \mathbf{J}_{f_i} + \nabla_{\mathbf{x}, y} \nabla_{\mathbf{w}} \ell(\mathbf{w}^\top \mathbf{x}, y) + n\lambda \mathbf{J}_{f_i} \right]_{\mathbf{w}^*, \mathbf{x}_i, y_i} \\
&= \left[ \mathbf{H}_{\mathbf{w}^*} \mathbf{J}_{f_i} + \nabla_{\mathbf{x}, y} \nabla_{\mathbf{w}} \ell(\mathbf{w}^\top \mathbf{x}, y) \right]_{\mathbf{w}^*, \mathbf{x}_i, y_i}, \quad (11)
\end{aligned}$$

where the Hessian  $\mathbf{H}_{\mathbf{w}^*} = \sum_{j=1}^n \nabla_{\mathbf{w}}^2 \ell(\mathbf{w}^{*\top} \mathbf{x}_j, y_j) + n\lambda \mathbf{I}$ . Solving for  $\mathbf{J}_{f_i}$  yields:

$$\mathbf{J}_{f_i} \Big|_{\mathbf{x}_i, y_i} = -\mathbf{H}_{\mathbf{w}^*}^{-1} \nabla_{\mathbf{x}, y} \nabla_{\mathbf{w}} \ell(\mathbf{w}^{*\top} \mathbf{x}_i, y_i). \quad (12)$$

## References
